# Supplementary material for: Snail1 is required for the maintenance of the pancreatic acinar phenotype
Source: Oncotarget. 2015 Dec 29;7(4):4468–82. doi: 10.18632/oncotarget.6785 (PMC4826219; doi:10.18632/oncotarget.6785)
Supplement: Supplementary file 1 [file oncotarget-07-4468-s001.pdf]

# Snail1 is required for the maintenance of the pancreatic acinar phenotype

## Supplementary Materials

### MATERIALS AND METHODS

#### Immunofluorescent analysis of pancreas

Double immunoHistoFluorescence analysis of Insulin and Glucagon on paraffin sections was performed as follows: after antigen retrieval by boiling the slides in citrate buffer pH 6 buffer during 10 min, samples were blocked and incubated overnight at 4°C with anti-Glucagon rabbit antiserum (Santa Cruz sc13091) and anti-Insulin monoclonal antibody (SIGMA I2018). After a washing, samples were incubated with anti-rabbit Alexa 488 and anti-mouse Alexa 555, counterstained with DAPI and mounted with Flouromount.

The triple analysis of Active Caspase 3, Amylase and CK19 was performed with rabbit anti Active Caspase 3 (Cell Signalling 9661), goat anti CK19 (Santa Cruz, sc-33111) and murine anti Amylase (Santa Cruz, sc-49957) all of them were used at 1/50 in PBS plus BSA (2%) for 1 h at room temperature. Anti-mouse Alexa 488, anti-rabbit Alexa 555 and anti-goat Alexa 647 conjugated fluorescent secondary antibodies were used for 1h at room temperature 1/500 in PBS plus BSA (2%). After DAPI staining, samples were mounted in Flouromount and images were captured on Leica SPE confocal microscope.

#### Secretome analysis

Wild-type or Snail1-depleted PMCs (106) cells were plated in a non-gelatine coated T150 flask in IMD medium with 10% FBS. After 24 h, cells were washed twice with PBS and cultured overnight with 4 ml of IMD medium without FBS. Sample media was concentrated by ultrafiltration with a MWCO membrane (Vivaspin 6, 3000 MW; Sartorius, Gottingen, Germany) and precipitated by the addition of six volumes of acetone (overnight, 4°C). Precipitated proteins were then dissolved in 50 µl of 6 M Urea plus 200 mM NH<sub>4</sub>HCO<sub>3</sub> and protein content was determined using the BCA Protein Quantification Kit (Thermo Fisher Scientific). Samples were reduced with dithiothreitol (60 nmol, 1 h, 37°C) and alkylated in the dark with iodoacetamide (120 nmol, 30 min, 25°C). The resulting protein extract was first diluted 1/3 with 200 mM NH<sub>4</sub>HCO<sub>3</sub> and digested with 0.2 µg of LysC (Wako, cat # 129-02541) overnight at 37°C and then diluted 1/2 and digested with 0.2 µg of trypsin (Promega, cat # V5113) for eight hours at 37°C. Finally, the peptide mix was acidified

with formic acid and desalted with MicroSpin C18 column (The Nest Group, Inc) prior to LC-MS/MS analysis.

Samples (1 mg) were analyzed using a LTQ-Orbitrap XL mass spectrometer (Thermo Fisher Scientific, San Jose, CA, USA) coupled to an EasyLC (Thermo Fisher Scientific (Proxeon), Odense, Denmark). Peptides were loaded directly onto the analytical column at a flow rate of 1.5–2 µl/min using a wash-volume of 4 times the injection volume, and were separated by reversed-phase chromatography using a 25-cm column with an inner diameter of 75 µm, packed with 5 µm C18 particles (Nikkyo Technos Co., Ltd. Japan). Chromatographic gradients started at 93% buffer A and 7% buffer B for 7 minutes with a flow rate of 250 nl/min, and gradually increased to 65% buffer A and 35% buffer B in 60 min. After each analysis, the column was washed for 15 min with 10% buffer A and 90% buffer B. Buffer A: 0.1% formic acid in water. Buffer B: 0.1% formic acid in acetonitrile.

The mass spectrometer was operated in positive ionization mode with nanospray voltage set at 2.5 kV and source temperature at 200°C. Ultramark 1621 for the FT mass analyzer was used for external calibration prior the analyses. Moreover, an internal calibration was also performed using the background polysiloxane ion signal at m/z 445.1200. The instrument was operated in DDA mode and full MS scans with 1 micro scans at resolution of 60,000 were used over a mass range of m/z 350–1500 with detection in the Orbitrap. Auto gain control (AGC) was set to 1E6, and dynamic exclusion (60 seconds) and charge state filtering disqualifying singly charged peptides were both activated. In each cycle of DDA analysis, following each survey scan the top twelve most intense ions with multiple charged ions above a threshold ion count of 5000 were selected for fragmentation at normalized collision energy of 35%. Fragment ion spectra produced via collision-induced dissociation (CID) were acquired in the ion trap, AGC was set to 5E4, isolation window of 2.0 m/z and maximum injection time of 50 ms was used. All data were acquired with Xcalibur software v2.2.

#### Data analysis

Proteome Discoverer software suite (v1.4, Thermo Fisher Scientific) and the Mascot search engine (v2.5, Matrix Science) were used for peptide identification and quantification. Samples were searched against a SwissProt database containing entries corresponding to Mouse (version of May 2015) a list of common

contaminants and all the corresponding decoy entries. Trypsin was chosen as enzyme and a maximum of three miscleavages were allowed. Carbamidomethylation (C) was set as a fixed modification, whereas oxidation (M) and acetylation (N-terminal) were used as variable modifications. Searches were performed using a peptide tolerance of 7 ppm, a product ion tolerance of 0.5 Da. Resulting data files were filtered for FDR < 5 %.

The proteomics analyses were performed in the “CRG/UPF Proteomics Unit, Centre de Regulació Genòmica (CRG), Universitat Pompeu Fabra (UPF), 08003 Barcelona”. The CRG/UPF Proteomics Unit is part of the Spanish Platform of Molecular and Bioinformatics Resources (ProteoRed), Instituto de Salud Carlos III (PT13/0001).

**Supplementary Table S1: Proteins listed just in PMC (Snail1Flox/+) and not in PMC (Snail1Flox/-)**

| UniProtKB<br>accession number |   | Description                                                      | Protein ID | Gene ID |
|-------------------------------|---|------------------------------------------------------------------|------------|---------|
| P11859                        | * | Angiotensinogen                                                  | ANGT       | 11606   |
| Q9QUN9                        | * | Dickkopf-related protein 3                                       | DKK3       | 50781   |
| Q07235                        | * | Glia-derived nexin                                               | GDN        | 20720   |
| P15535                        | * | Beta-1, 4-galactosyltransferase 1                                | B4GT1      | 14595   |
| Q8K482                        | * | Emilin-2                                                         | EMIL2      | 246707  |
| P33435                        | * | Collagenase 3                                                    | MMP13      | 17386   |
| P04186                        | * | Complement factor B                                              | CFAB       | 14962   |
| Q9Z0J0                        | * | Epididymal secretory protein E1                                  | NPC2       | 67963   |
| P10923                        | * | Osteopontin                                                      | OSTP       | 20750   |
| Q8R550                        |   | SH3 domain-containing kinase-binding protein 1                   | SH3K1      | 58194   |
| P47757                        |   | F-actin-capping protein subunit beta                             | CAPZB      | 12345   |
| P14069                        |   | Protein S100-A6                                                  | S10A6      | 20200   |
| O88544                        |   | COP9 signalosome complex subunit 4                               | CSN4       | 26891   |
| Q8BP47                        |   | Asparagine—tRNA ligase, cytoplasmic                              | SYNC       | 70223   |
| Q9Z1Z2                        |   | Serine-threonine kinase receptor-associated protein              | STRAP      | 20901   |
| P46061                        |   | Ran GTPase-activating protein 1                                  | RAGP1      | 19387   |
| P63087                        |   | Serine/threonine-protein phosphatase PP1-gamma catalytic subunit | PP1G       | 19047   |
| Q9CQC6                        |   | Basic leucine zipper and W2 domain-containing protein 1          | BZW1       | 66882   |
| Q64213                        |   | Splicing factor 1                                                | SF01       | 22668   |
| P62918                        |   | 60S ribosomal protein L8                                         | RL8        | 26961   |
| Q9CZ30                        |   | Obg-like ATPase 1                                                | OLA1       | 67059   |
| Q99LP6                        |   | GrpE protein homolog 1, mitochondrial                            | GRPE1      | 17713   |
| P56480                        |   | ATP synthase subunit beta, mitochondrial                         | ATPB       | 11947   |
| Q8R081                        |   | Heterogeneous nuclear ribonucleoprotein L                        | HNRPL      | 15388   |
| P38647                        |   | Stress-70 protein, mitochondrial                                 | GRP75      | 15526   |
| Q9JMK0                        |   | Beta-1, 4-galactosyltransferase 5                                | B4GT5      | 56336   |
| P62270                        |   | 40S ribosomal protein S18                                        | RS18       | 20084   |
| P62908                        |   | 40S ribosomal protein S3                                         | RS3        | 27050   |
| Q60668                        |   | Heterogeneous nuclear ribonucleoprotein D0                       | HNRPD      | 11991   |
| P15864                        |   | Histone H1.2                                                     | H12        | 50708   |
| Q61079                        |   | Single-minded homolog 2                                          | SIM2       | 20465   |
| P97493                        |   | Thioredoxin, mitochondrial                                       | THIOM      | 56551   |

\*extracellular

**Supplementary Table S2: Proteins listed just in PMC (Snail1<sup>Flox/-</sup>) and not in PMC (Snail1<sup>Flox/+</sup>)**

| UniProtKB<br>accession number |   | Description                                                   | Protein ID | Gene ID |
|-------------------------------|---|---------------------------------------------------------------|------------|---------|
| Q04857                        | * | Collagen alpha-1(VI) chain                                    | CO6A1      | 12833   |
| Q8CG16                        | * | Complement C1r-A subcomponent                                 | C1RA       | 50909   |
| Q3V1G4                        | * | Olfactomedin-like protein 2B                                  | OLM2B      | 320078  |
| O88322                        | * | Nidogen-2                                                     | NID2       | 18074   |
| Q9WVJ3                        | * | Carboxypeptidase Q                                            | CBPQ       | 54381   |
| P18242                        | * | Cathepsin D                                                   | CATD       | 13033   |
| Q91WP6                        | * | Serine protease inhibitor A3N                                 | SPA3N      | 20716   |
| Q06890                        | * | Clusterin                                                     | CLUS       | 12759   |
| P23116                        |   | Eukaryotic translation initiation factor 3 subunit A          | EIF3A      | 13669   |
| Q9JIF7                        |   | Coatomer subunit beta                                         | COPB       | 70349   |
| Q3UM45                        |   | Protein phosphatase 1 regulatory subunit 7                    | PP1R7      | 66385   |
| Q00612                        |   | Glucose-6-phosphate 1-dehydrogenase X                         | G6PD1      | 14381   |
| P23780                        |   | Beta-galactosidase                                            | BGAL       | 12091   |
| P80314                        |   | T-complex protein 1 subunit beta                              | TCPB       | 12461   |
| P11983                        |   | T-complex protein 1 subunit alpha                             | TCPA       | 21454   |
| Q62084                        |   | Protein phosphatase 1 regulatory subunit 14B                  | PP14B      | 18938   |
| P46935                        |   | E3 ubiquitin-protein ligase NEDD4                             | NEDD4      | 17999   |
| Q3UHX2                        |   | 28 kDa heat- and acid-stable phosphoprotein                   | HAP28      | 231887  |
| Q9WUM4                        |   | Coronin-1C                                                    | COR1C      | 23790   |
| P29416                        |   | Beta-hexosaminidase subunit alpha                             | HEXA       | 15211   |
| P26516                        |   | 26S proteasome non-ATPase regulatory subunit 7                | PSD7       | 17463   |
| O08553                        |   | Dihydropyrimidinase-related protein 2                         | DPYL2      | 12934   |
| P23506                        |   | Protein-L-isoaspartate(D-aspartate) O-methyltransferase       | PIMT       | 18537   |
| Q9D1M0                        |   | Protein SEC13 homolog                                         | SEC13      | 110379  |
| Q8BFR4                        |   | N-acetylglucosamine-6-sulfatase                               | GNS        | 75612   |
| P97825                        |   | Hematological and neurological expressed 1 protein            | HN1        | 15374   |
| O35381                        |   | Acidic leucine-rich nuclear phosphoprotein 32 family member A | AN32A      | 11737   |
| Q7TQI3                        |   | Ubiquitin thioesterase OTUB1                                  | OTUB1      | 107260  |
| P42208                        |   | Septin-2                                                      | SEPT2      | 18000   |
| O55131                        |   | Septin-7                                                      | SEPT7      | 235072  |
| Q8BL97                        |   | Serine/arginine-rich splicing factor 7                        | SRSF7      | 225027  |
| P48024                        |   | Eukaryotic translation initiation factor 1                    | EIF1       | 20918   |
| Q9Z1Q5                        |   | Chloride intracellular channel protein 1                      | CLIC1      | 114584  |
| P54227                        |   | Stathmin                                                      | STMN1      | 16765   |

\*extracellular

**Supplementary Table S3: Oligonucleotides used for RT-PCR analysis**

|          | <b>Forward</b>                  | <b>Reverse</b>                  |
|----------|---------------------------------|---------------------------------|
| Snail1   | 5'-CTTGTGTCTGCACGACCTGT-3'      | 5'-CTTCTCACCAGTGTGGGTGC-3'      |
| CD105    | 5'-GCTACTCATGTCCCTGATCCA-3'     | 5'-TGGAGTCCCAGAAAAGTCAGG-3'     |
| Desmin   | 5'-TGGAGCGTGACAACCTGATA-3'      | 5'-AAGGCAGCCAAGTTGTTCTC-3'      |
| GFAP     | 5'-TAAGCTAGCCCTGGACATCG-3'      | 5'-GGATCTGGAGGTTGGAGAAA-3'      |
| FN1      | 5'-AGCAAGCCTGAGCCTGAAGAG-3'     | 5'-GCGATTTGCAATGGTACAGCT-3'     |
| Vimentin | 5'-GGCTGCGAGAGAAATTGC-3'        | 5'-TCTCTTCATCGTGCAGTTTCTTC-3'   |
| Axin2    | 5'-CCAAGTGTCTCTACCTCATTTTCCG-3' | 5'-GGTTTGTGGGTCCTCTTCATAGC-3'   |
| Akt2     | 5'-CAAGCGTGGTGAATACATCAAGAC-3'  | 5'-CTGCTACGGAGAAGTTGTTTAAGGG-3' |
| Zeb1     | 5'-TCAGCTGCTCCCTGTGCAGT-3'      | 5'-AAGGCCTTCCCGCATTTCAGT-3'     |
| c-Myc    | 5'-GCTGGAGATGATGACCGAGT-3'      | 5'-AACCGCTCCACATACAGTCC-3'      |
| COX2     | 5'-GGCCATGGAGTGGACTTAA-3'       | 5'-CTCCACCAATGACCTGATATTT-3'C   |
| 15-HPGD  | 5'-GTTTTACACCCATCAACCATTGC-3'   | 5'-GGAGGTTAATGGAGCTTTTACGAGT-3' |
| IL6      | 5'-CTGATGCTGGTGACAACCAC-3'      | 5'-CAGAATTGCCATTGCACAAC-3'      |

All sequences correspond to murine genes

**Liver**

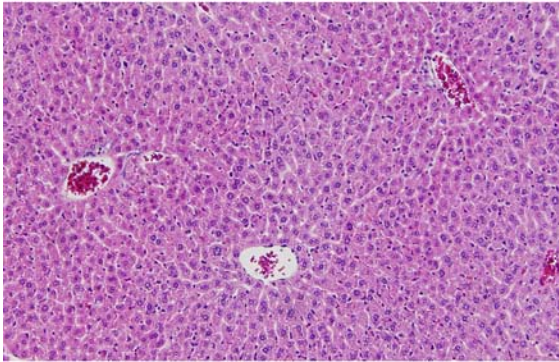

**Colon**

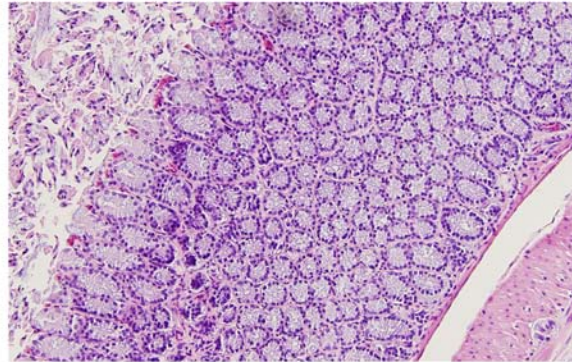

**Kidney**

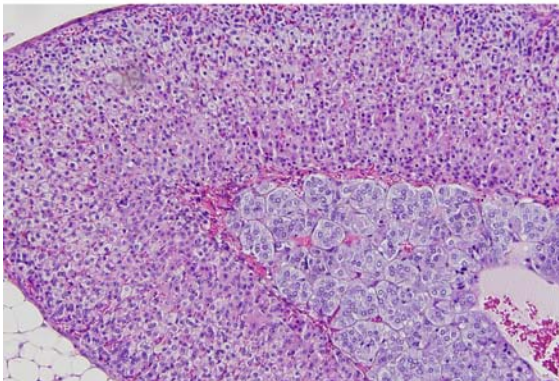

**Small Intestine**

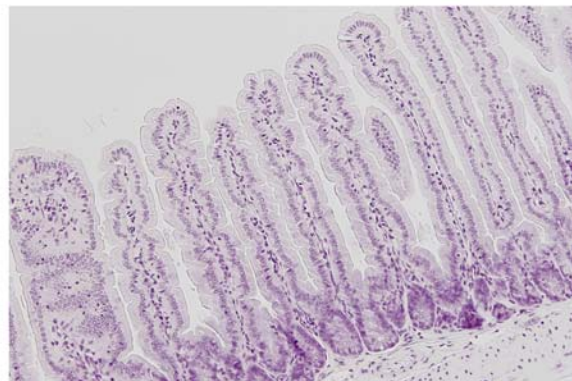

**Supplementary Figure S1: Snail1-deficient mice do not present alterations in the liver, colon, kidney or small intestine.** The figure shows hematoxylin-eosin staining of sections corresponding to the indicated organs from Snail1<sup>Flox/-</sup> mice four weeks after tamoxifen injection.

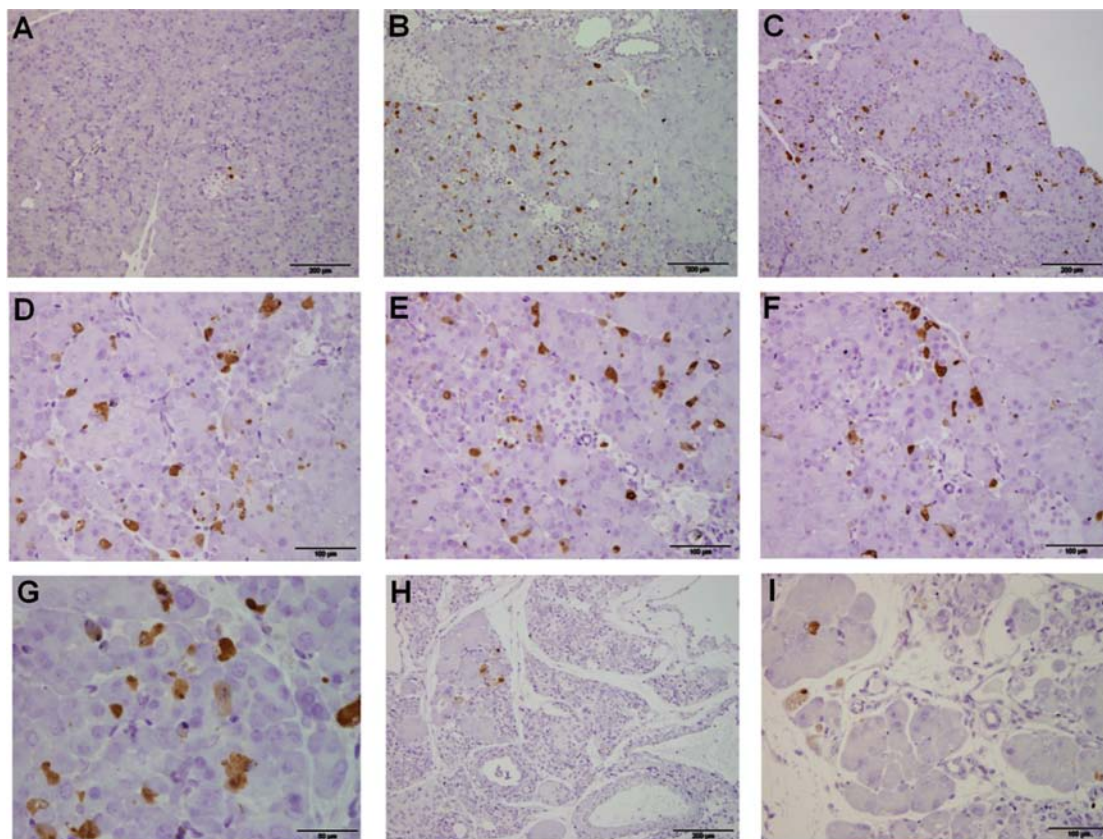

**Supplementary Figure S2: Induction of apoptosis in pancreata by Snail1 depletion.** Active caspase-3 staining in pancreas from control (Snail1<sup>Flox/+</sup>) (A) or Snail1-depleted (Snail1<sup>Flox/-</sup>) (B–I) mice one week (panels A to G) or two weeks (H–I) after tamoxifen injection.

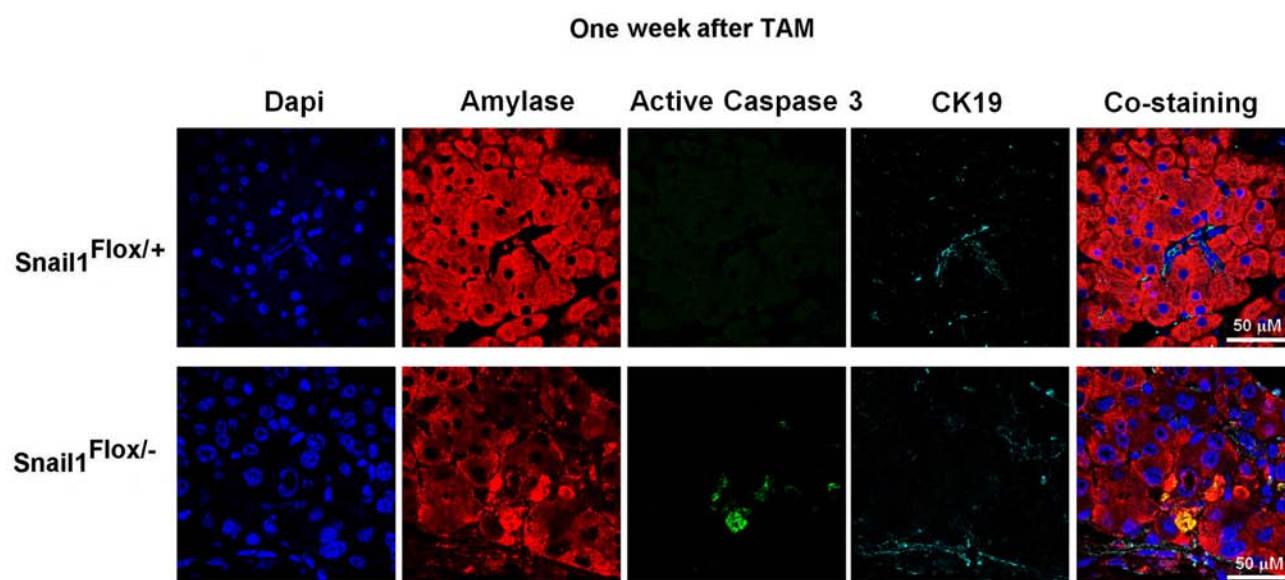

**Supplementary Figure S3: Apoptosis in pancreas upon Snail1 depletion takes place in acinar cells.** One week after TAM injection control (Snail1<sup>Flox/+</sup>) or Snail1-depleted (Snail1<sup>Flox/-</sup>) pancreas were analyzed for expression of markers of apoptosis (active caspase 3), acinar cells (amylase) or ductal cells (CK19) by immunofluorescence.

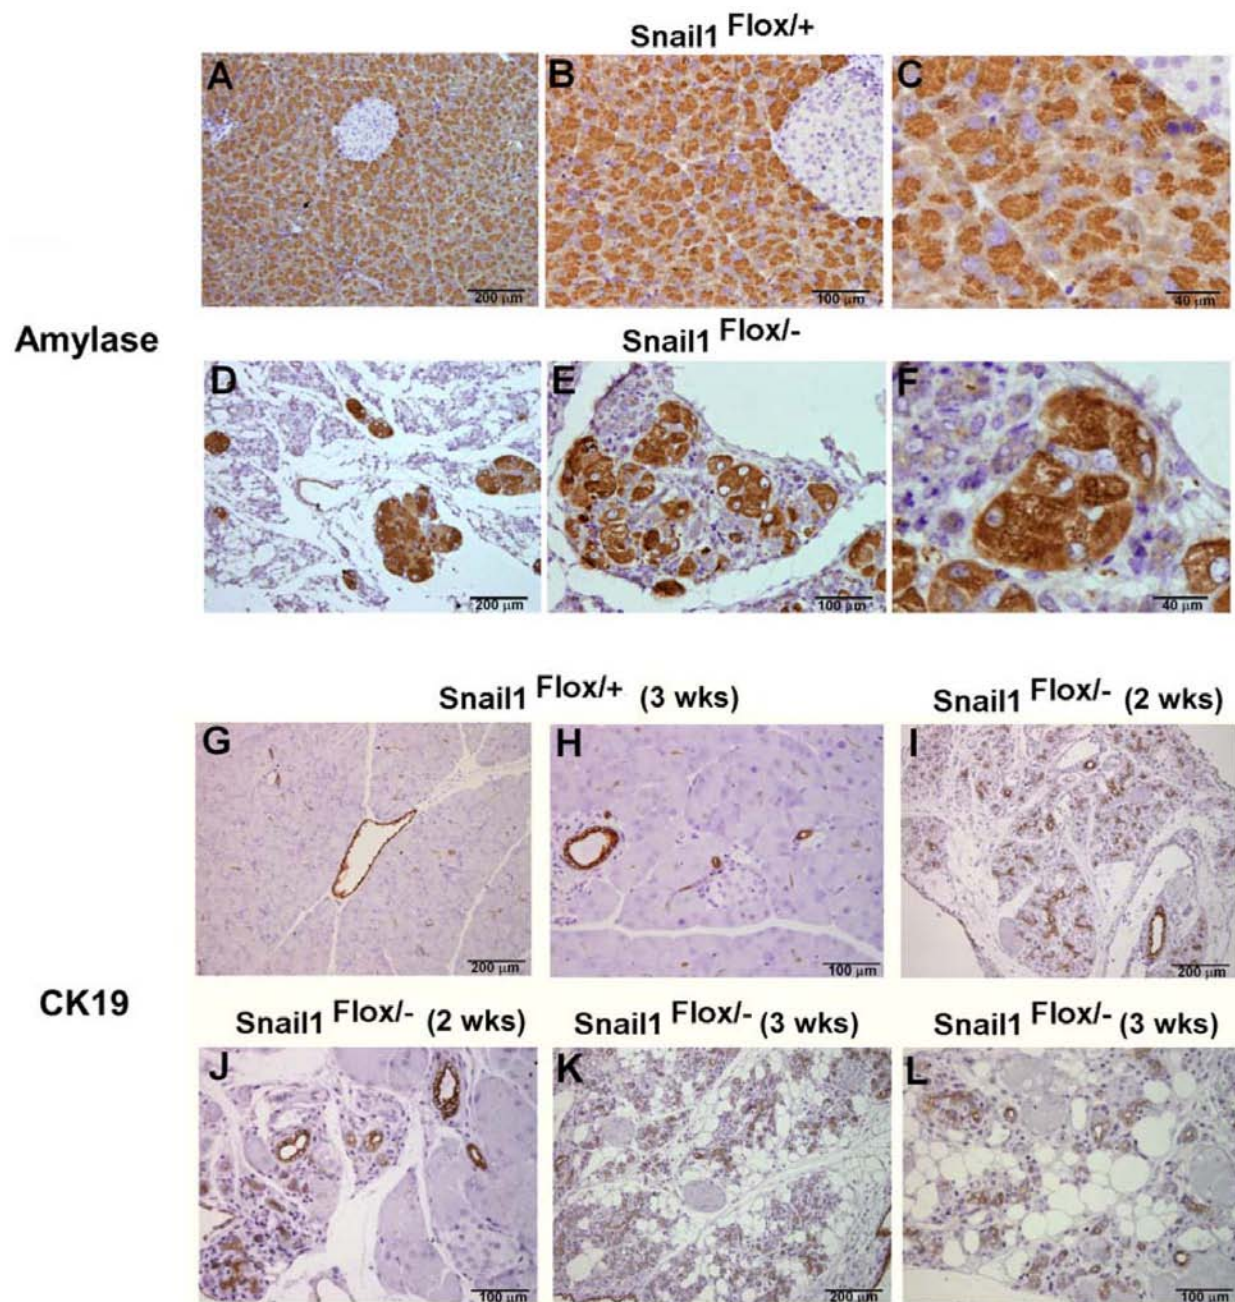

**Supplementary Figure S4: Ductal cells are resistant to Snail-depletion.** Amylase and CK19 expression was determined in control or Snail1-deficient mice two or three weeks after tamoxifen administration.

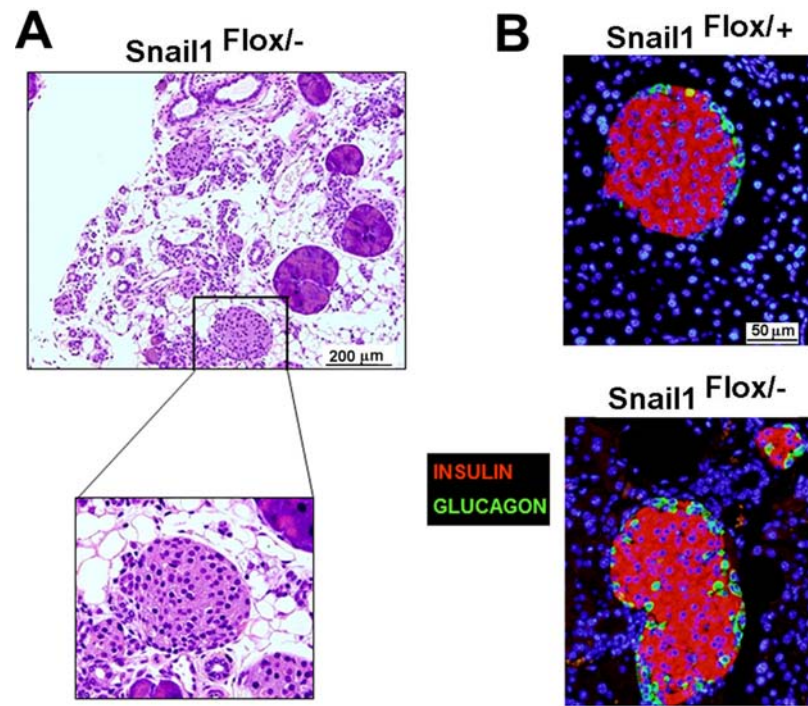

**Supplementary Figure S5: Islets are not affected by *Snail1* depletion.** The figure shows a representative section of a pancreas obtained from a *Snail1*-deficient mice four weeks after injection of tamoxifen, with the corresponding amplification (**A**), and the immunofluorescence staining of insulin and glucagon in islets obtained from this and from a control (*Snail1*<sup>Flox/+</sup>) mouse (**B**).

**Snail1<sup>Flox/+</sup>**

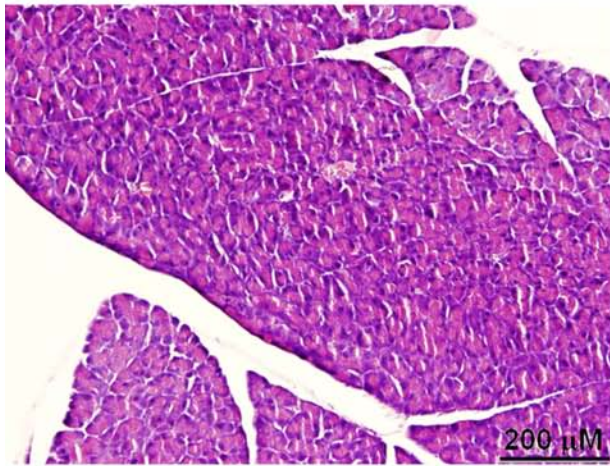

**Snail1<sup>Flox/-</sup>**

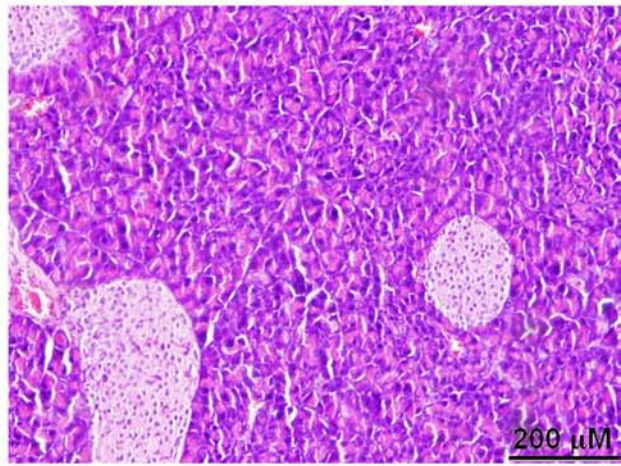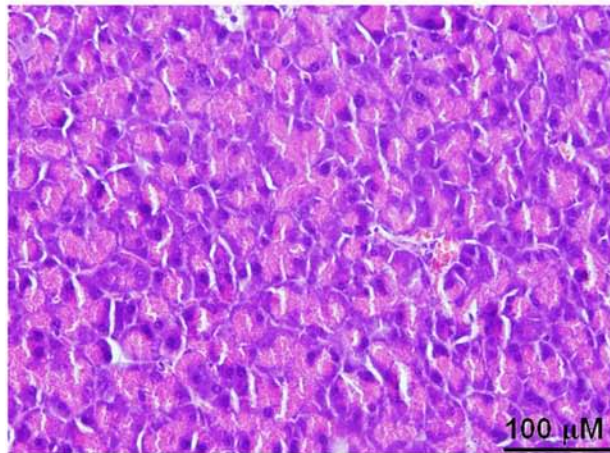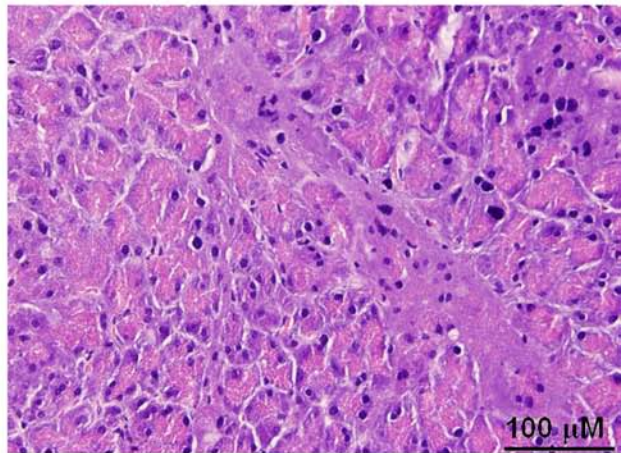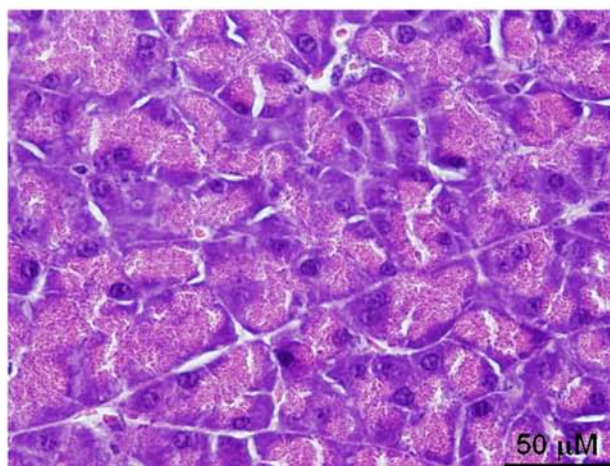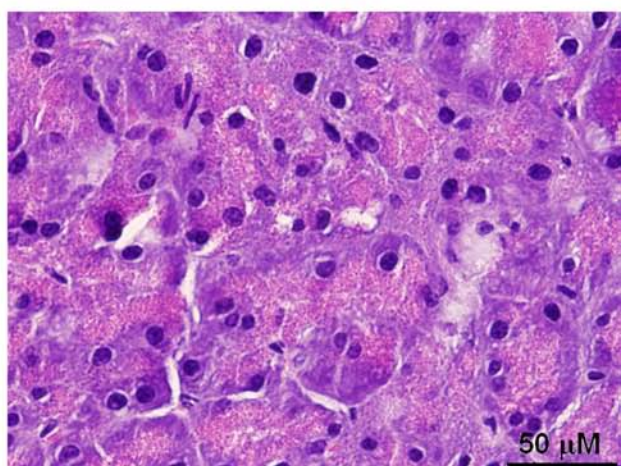

**Supplementary Figure S6: Snail1 depletion in acinar cells does not alter pancreas morphology.** Two months-old PTF1/p48-Cre-ER, Snail1<sup>Flox/-</sup> mice were euthanized and pancreas analyzed four weeks after tamoxifen injection. Snail1<sup>Flox/+</sup> mice were used as control. The figure shows a representative micrograph of the organ with magnification.

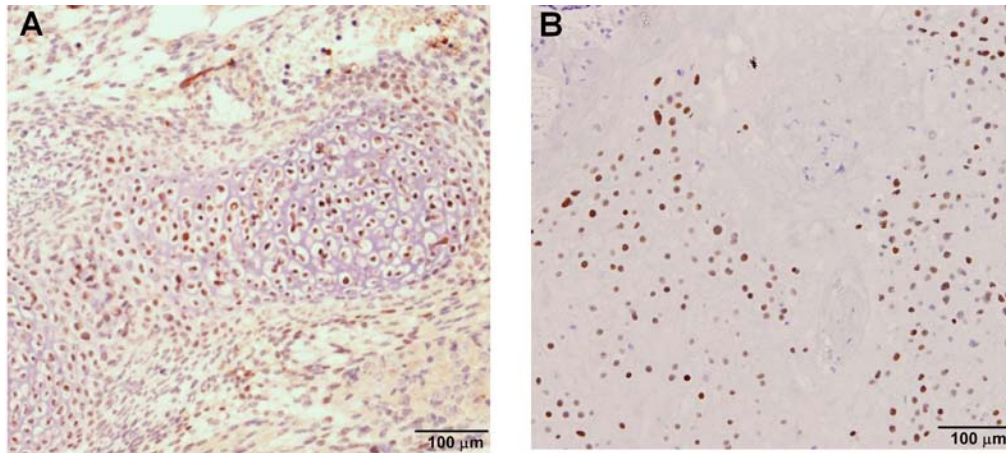

**Supplementary Figure S7: Positive controls of Snail1 expression.** Expression of Snail1 was determined in paraffin-embedded samples obtained from murine embryos (E15.5) (A), or from human placenta (B). In embryos expression of Snail1 was high in the cartilage as previously reported (8).

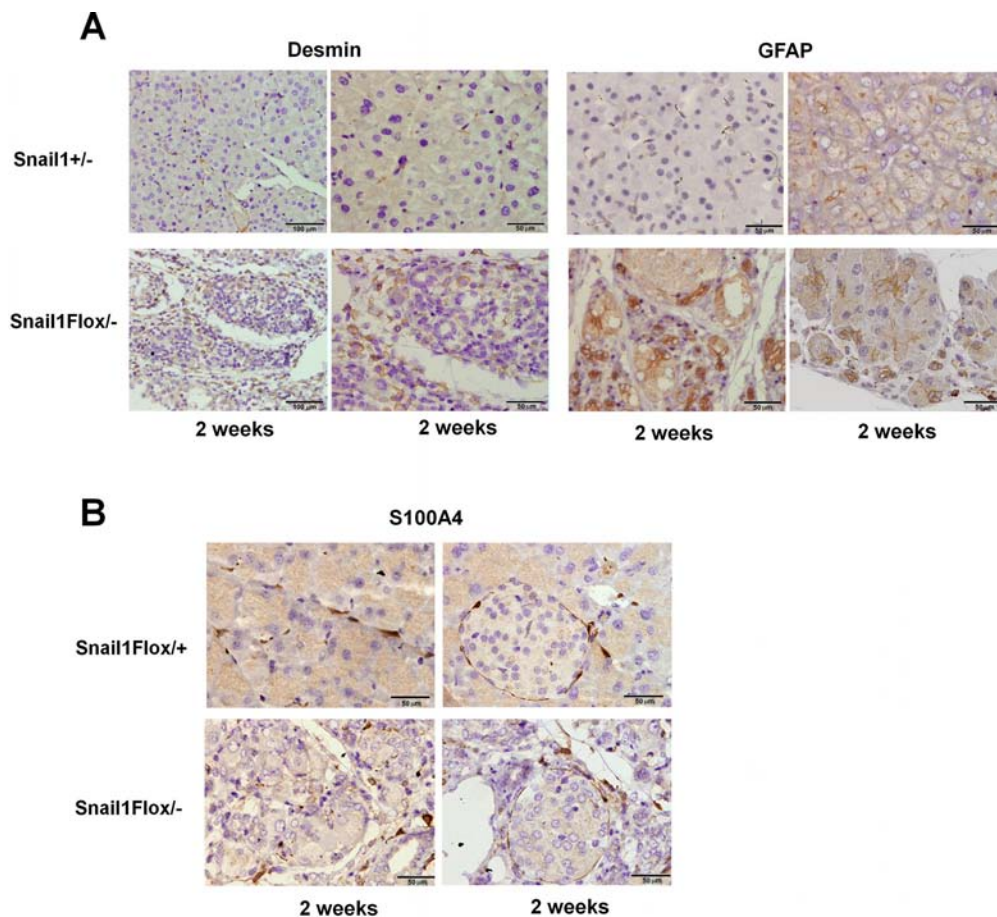

**Supplementary Figure S8: Desmin, GFAP or S100A4 stain a different subset of mesenchymal cells than Snail1.** Control or Snail1-deficient mice were analyzed for Desmin, GFAP (A) or S100A4 (B) expression at the indicated times.

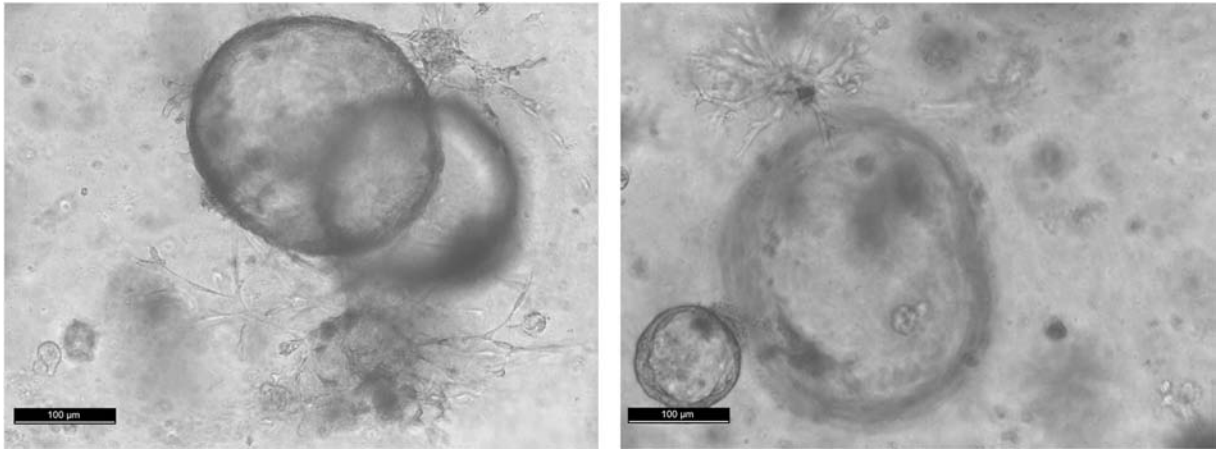

**Supplementary Figure S9: Micrograph of a culture of pancreas cells grown in the presence of wild-type PMCs.** The morphology of large and medium spheres and co-cultured PMCs is shown.

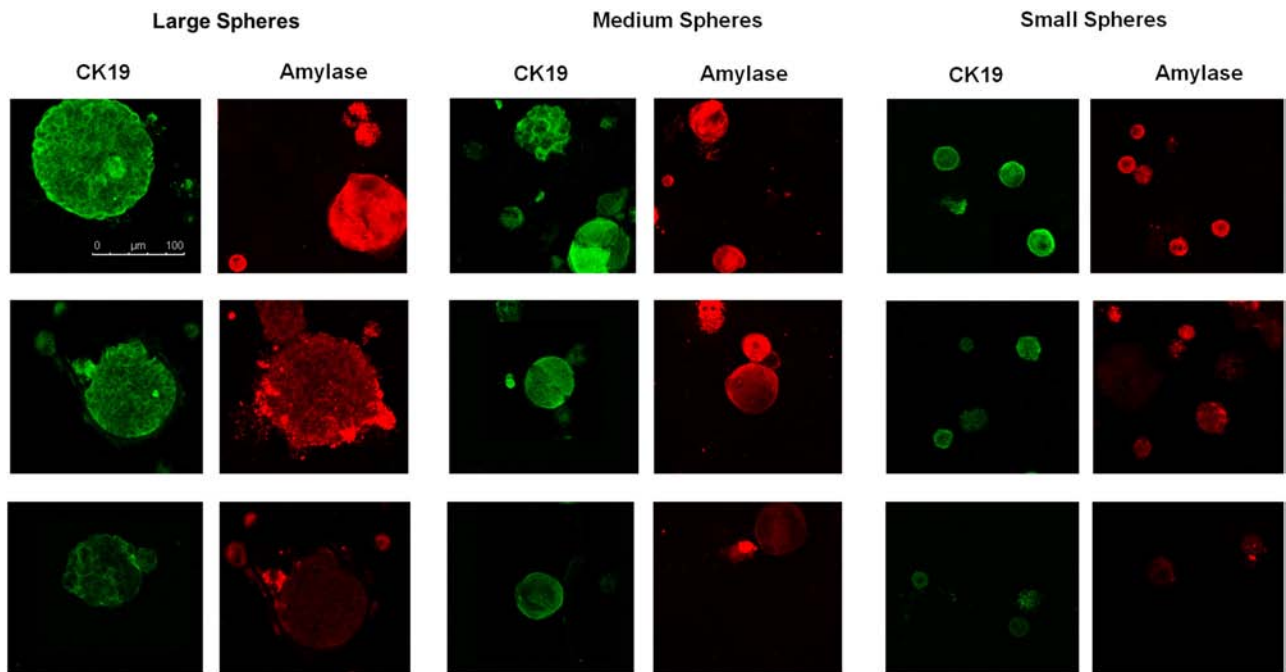

**Supplementary Figure S10: Expression of CK19 and Amylase in cultured pancreas spheres.** The figure shows large, medium and small spheres stained with Amylase or CK19 antibodies. A representative case of a structure categorized as high, medium or low staining for each makers and each type of structure is shown.

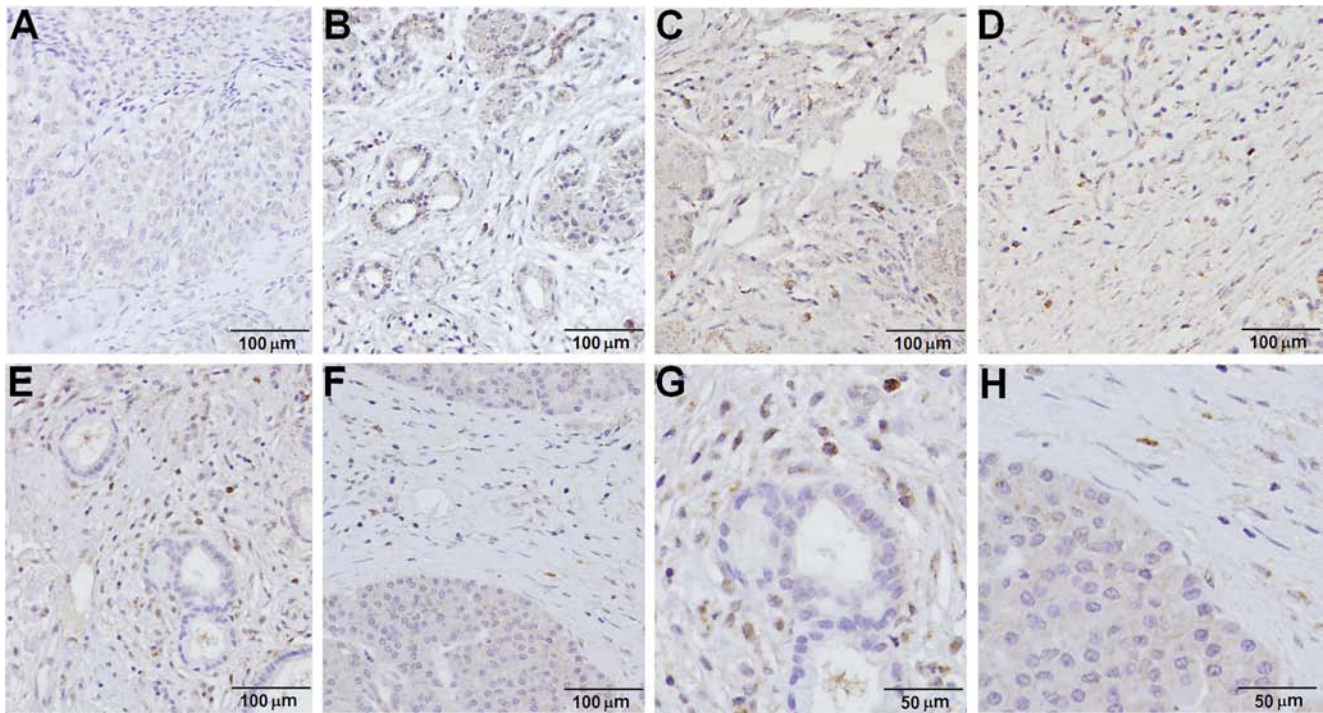

**Supplementary Figure S11: Expression of Snail1 in human pancreas tumors.** The figure shows the result of Snail1 staining in four preneoplastic lesions (PanIN), two without or with low Snail1 expression (**A** and **B**) and two with Snail1 expression (**C** and **D**), from a total of six analyzed. Snail1 staining in two pancreatic adenocarcinomas is presented in (**E** and **F**). These panels correspond to representative results of the five tumors analyzed, all presenting Snail1 expression in the stroma. Panels (**G** and **H**) are higher magnifications of (**E** and **F**), respectively.
